# Supplementary material for: Seasonal dynamics in leaf litter decomposing microbial communities in temperate forests: a whole-genome- sequencing-based study
Source: PeerJ journal article supplement (doi:10.7717/peerj.17769), 2024-09-23
Supplement: FigS1.pdf [file FigS1.pdf]

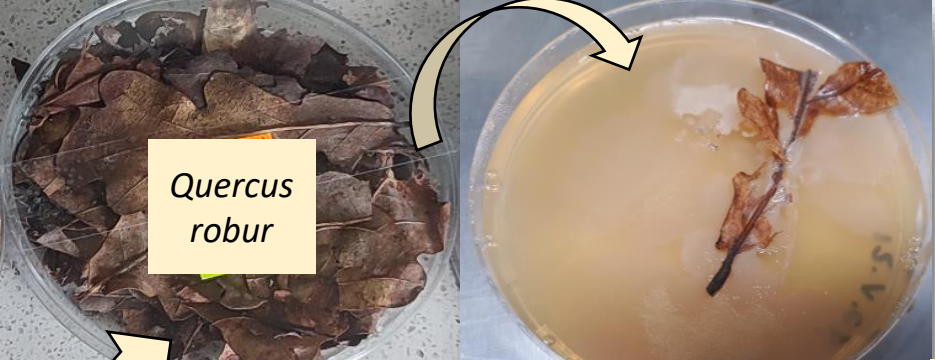

*Quercus robur*

0 months of decomposition

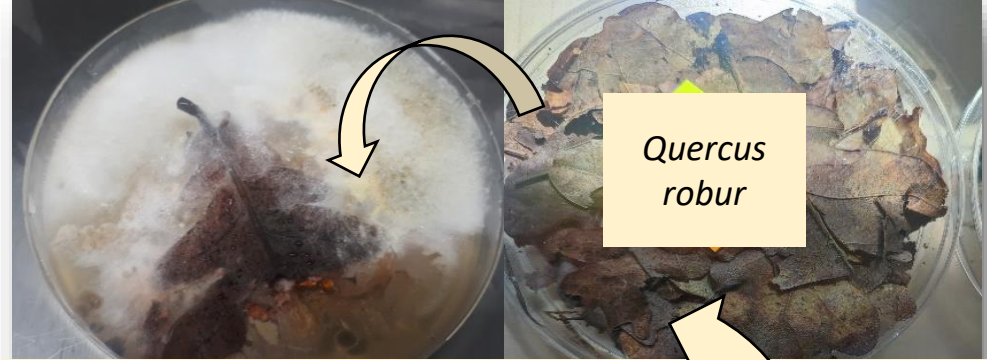

*Quercus robur*

18 months of decomposition

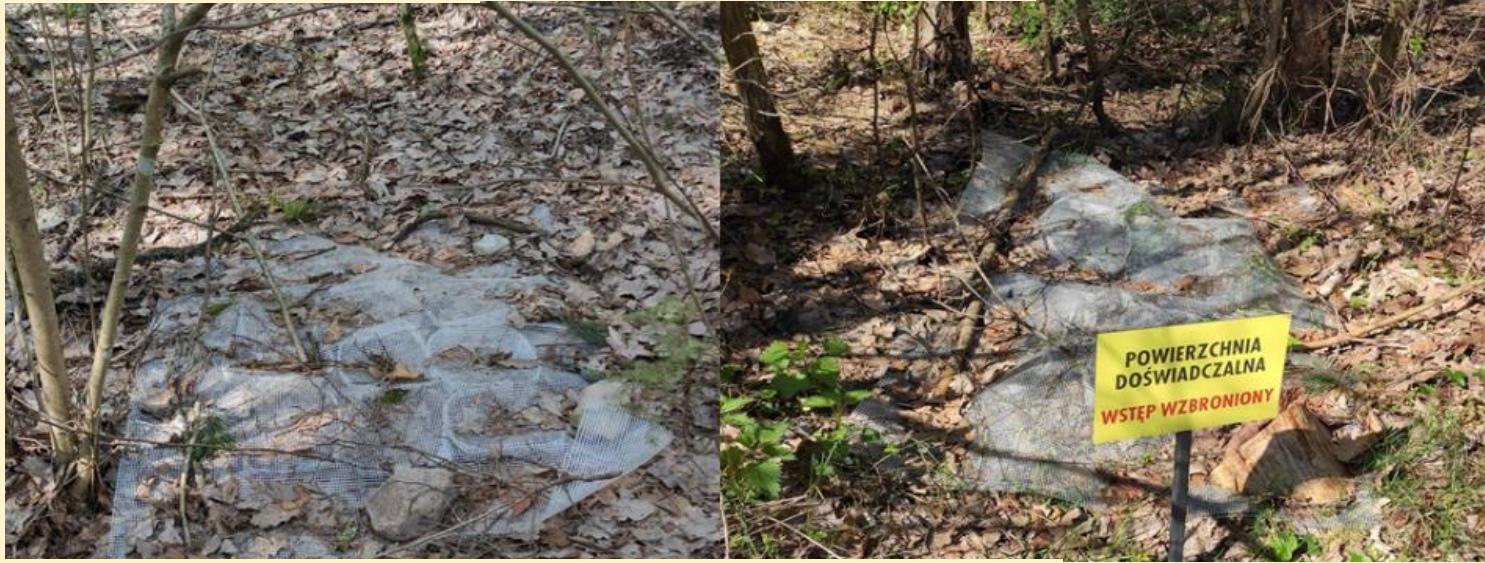

0 months of decomposition

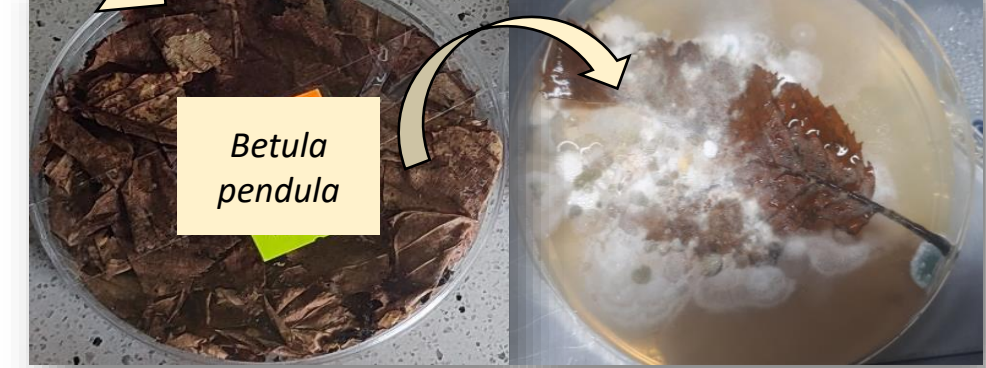

*Betula pendula*

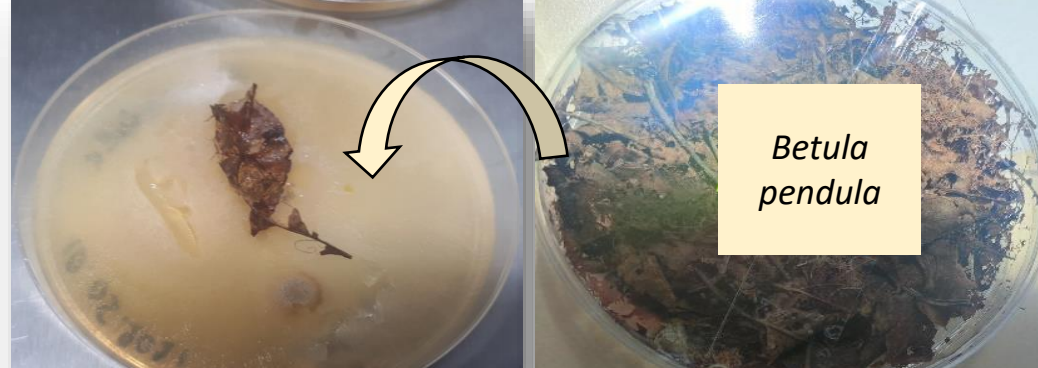

*Betula pendula*
