# Supplementary material for: Seasonal dynamics in leaf litter decomposing microbial communities in temperate forests: a whole-genome- sequencing-based study
Source: PeerJ journal article supplement (doi:10.7717/peerj.17769), 2024-09-23

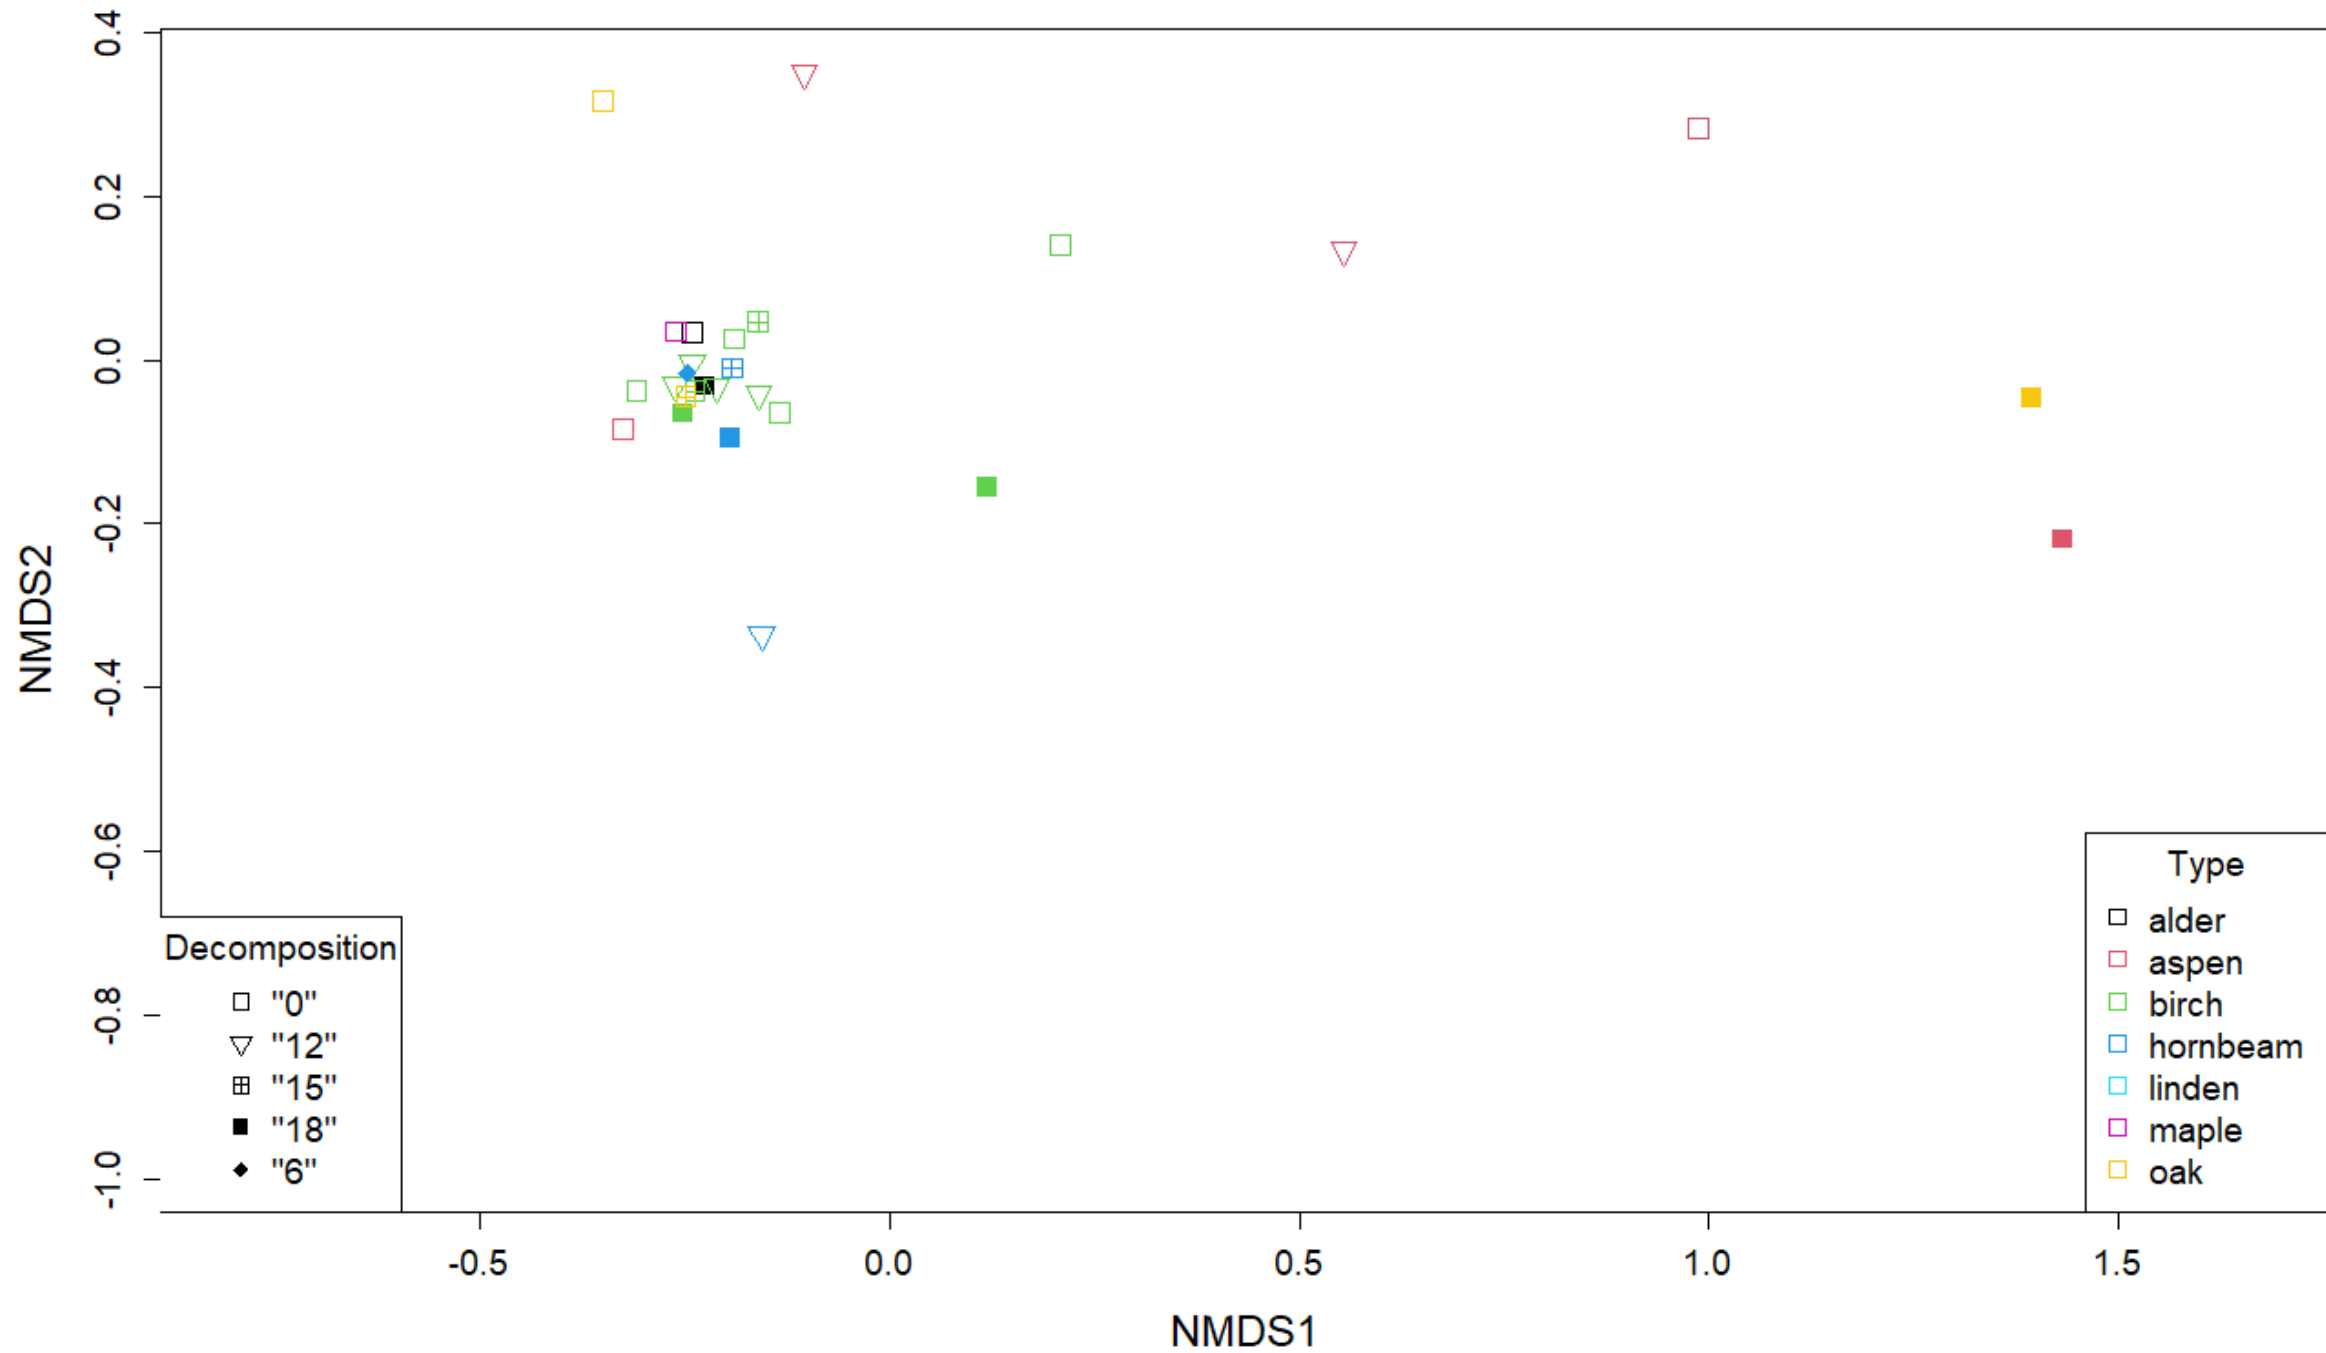

Supplement: FigS3.pdf [file FigS3.pdf]
